# Supplementary material for: Electrophysiological assessment of auditory processing disorder in children with non-syndromic cleft lip and/or palate
Source: PeerJ. 2016 Aug 25;4:e2383. doi: 10.7717/peerj.2383 (PMC5012300; doi:10.7717/peerj.2383)
Supplement: Data S1 [file peerj-04-2383-s001.xlsx]

## Sheet: FISHER & ELECTROPHYSIOLOGY
								226 Hz probe tone tympanometry				ABR latencies (ms)				P1-N1-P2		P300
User ID	Age	Gender	Type of cleft	Ear	Fisher Q'naire	No.	PTA (dB)	Type of tympanograms	Pressure	Acoustic immittance	Acoustic reflex threshold	WaveⅠ	Wave III	Wave V	I-V	N1 latency (ms)	N1-P2 amplitude (uv)	Lantencies (ms)	Amplitude (uv)
7045954	12.25	2	3	1	1		7.5	1	-90	0.5	105	1.2	3.4	5.3	4.1	94	9.48	292	1.64
				2			7.5	1	-90	0.6	105	1.27	3.33	5.17	3.9	128	2.61	304	3.17
1000156589	9.33	1	3	1	0.92		7.5	1	-90	1.1	105	1.3	3.63	5.47	4.17	190	11.237	342	6.03
				2			7.5	1	35	1.3	105	1.3	3.53	5.47	4.07	160	14.63	346	10.14
A067447	9	2	1	1	0.96		7.5	1	-99	0.6	105	1.37	3.53	5.37	4	84	19.31	276	2.28
				2			7.5	2	-30	0.2	105	1.43	3.73	5.6	4.17	114	13.9	276	5.68
1000082665	9.42	1	3	1	0.84		11.25	1	-75	0.4	105	1.4	3.77	5.8	4.4	112	13.07	342	8.94
				2			10	1	-99	0.9	105	1.37	3.83	5.87	4.5	82	5.97	250	5.76
1000154875	10	1	3	1	0.92		6	1	-90	0.9	95	1.37	4	5.9	4.53	102	4.87	288	9.42
				2			10	1	-90	1	95	1.43	3.93	5.73	4.3	98	2.37	302	4.44
1000087002	11.17	2	1	1	1		6.25	1	-65	0.9	95	1.33	3.53	5.33	4	100	4.93	262	9.63
				2			8.75	1	-40	0.9	105	1.43	3.6	5.33	3.9	82	6.1	254	6.87
1000155843	9	1	3	1	1		0	1	-5	0.9	95	1.1	3.67	5.6	4.5	100	14.75	320	6.4
				2			15	1	-90	1	105	1.5	4.17	5.93	4.43	104	3.43	278	2.41
1000151993	12.58	1	1	1	0.96		3.75	1	-65	0.7	95	1.37	3.7	5.57	4.2	118	2.2	328	1.04
				2			1.25	1	-30	1	95	1.37	3.7	5.43	4.07	110	10.14	284	13.6
0000591673	14	2	1	1	0.8		10	2	-90	1.4	105	1.37	3.53	5.53	4.17	118	4.83	346	3.92
				2			7.5	1	-10	1.1	95	1.3	3.43	5.33	4.03	90	2.92	328	1.86
1000167422	9.67	1	3	1	0.96		6.25	1	-30	0.8	105	1.33	3.47	5.47	4.13	114	7.08	302	13.65
				2			7.25	1	-5	0.7	105	1.23	3.53	5.6	4.37	90	3.32	278	8.56
1000152618	6.83	1	3	1	0.96		8.75	1	55	0.9	105	1.3	3.73	5.87	4.57	86	4.95	298	4.47
				2			11.25	1	150	0.7	105	1.3	3.7	5.67	4.37	146	13.69	302	5.81
1000169188	11.25	2	3	1	0.92		10	1	-75	0.8	105	1.27	3.33	5.47	4.2	106	7.03	292	3.76
				2			10	1	190	0.7	105	1.23	3.33	5.23	4	134	5.63	292	3.81
1000153783	10.75	1	3	1	0.96		10	1	-65	1.3	105	1.4	3.63	5.67	4.27	120	2.78	288	5.74
				2			11.25	1	-90	1.7	95	1.43	3.77	5.63	4.2	116	5.55	276	4.81
0007022404	12.83	1	1	1	1		3.75	1	-75	1.3	95	1.1	3.7	5.63	4.53	76	8.8	292	3.59
				2			1.25	1	-75	1.5	95	1.2	3.47	5.6	4.4	154	6.2	298	6.7
1000168935	8.58	1	1	1	1		7.5	1	-10	0.9	95	1.27	3.53	5.6	4.33	84	12.583	296	4.08
				2			8.75	1	-15	0.9	85	1.3	3.67	5.5	4.2	96	19.179	290	4.02
1000154868	7.58	2	3	1	0.96		6.25	1	-30	0.8	95	1.23	3.7	5.33	4.1	126	6.3	314	6.04
				2			10	1	-75	0.7	105	1.23	3.57	5.57	4.33	114	7.43	346	5.47
7059088	9.58	1	3	1	0.64		2.5	1	-90	0.6	105	1.1	3.67	5.47	4.37	130	4.28	286	8.72
				2			2.5	1	-90	0.6	105	1.1	3.7	5.47	4.37	130	6.17	322	13.2
1000169848	12.42	1	1	1	0.92		8.75	1	-75	1.4	85	1.3	3.67	5.77	4.47	146	5.65	298	9.7
				2			15	1	-75	1	95	1.33	3.77	5.8	4.47	126	3.57	306	4.24
1000004734	7.92	2	3	1	0.96		6.25	1	-15	0.4	105	1.27	3.5	5.57	4.3	98	5.85	308	9.48
				2			5	1	-5	0.5	105	1.37	3.67	5.5	4.13	84	6.43	292	5.78
7026538	13	1	3	1	0.92		12.51	1	-90	0.8	105	1.3	3.63	5.63	4.33	122	6.32	280	3.85
				2			21.25	1	-90	0.9	105	1.3	4.03	5.47	4.17	140	5.57	284	5.51
A052742	10	1	3	1	1		4.25	1	-2	0.8	105	1.37	3.7	5.6	4.23	80	4.31	328	7.07
				2			12.25	1	-15	0.8	105	1.4	3.7	5.6	4.2	148	7	330	3.02
1000018582	8.67	1	1	1	0.92		5	1	-55	1	105	1.53	3.9	5.67	4.13	84	14.3	292	10.1
				2			7.5	1	-5	1.2	95	1.37	3.77	5.67	4.2	118	4.75	284	9.81
1000038491	7.17	2	1	1	0.92		10	1	-40	0.5	105	1.27	3.7	5.63	4.37	128	14.52	266	2.6
				2			15	1	-75	0.5	105	1.17	3.57	5.4	4.23	90	12.38	300	8.81
1000124426	11.58	1	3	1	0.72		6.25	1	-40	0.8	105	1.47	3.97	5.83	4.37	80	8.84	322	8.02
				2			2.5	1	20	0.9	85	1.37	3.8	5.67	4.3	64	10.42	302	6.72
1000170217	6.92	1	3	1	1		5	1	-5	0.6	105	1.27	3.63	5.53	4.27	96	18.55	282	10.9
				2			6.25	1	-15	0.7	105	1.23	3.6	5.47	4.23	86	15.73	262	9.45
1000162171	13	1	3	1	0.92		6.25	1	-75	1.1	105	1.3	3.97	5.83	4.53	126	7.51	322	9.76
				2			10	1	-135	1	105	1.43	3.83	5.73	4.3	132	3.85	334	2.34
1000052946	6.17	1	3	1	0.96		7.25	1	-5	0.6	105	1.3	3.77	5.73	4.43	102	3.34	268	14
				2			5	1	-65	0.6	105	1.27	3.6	5.65	4.33	84	21.53	284	2.14
1000171388	10.08	1	1	1	0.88		1.25	1	-5	0.7	105	1.33	3.63	5.33	4	106	10.01	310	6.67
				2			10	1	-15	0.9	105	1.33	3.6	5.37	4.03	88	18.06	314	5.89
1000088017	13.92	2	3	1	0.72		7.5	1	-15	0.9	95	1.37	3.7	5.67	4.3	86	6.21	260	2.47
				2			6.25	1	-90	1.2	95	1.53	3.8	6.03	4.5	104	3.59	304	5.32
1000069299	10.25	1	3	1	0.84		18.75	1	-90	0.6	105	1.4	3.9	5.67	4.27	122	8.66	260	4.93
				2			11.25	1	-95	0.6	105	1.37	3.97	5.73	4.37	186	5.82	284	10.87
1000122626	10.5	1	2	1	0.96		7.5	1	-30	0.7	105	1.4	3.93	5.8	4.4	98	10.9	314	10.2
				2			8.75	1	-20	0.9	105	1.33	3.83	5.73	4.4	92	6.36	326	10.65
1000172102	14.75	2	3	1	0.92		5	1	20	0.8	105	1.5	3.6	5.8	4.3	128	7.57	288	9.56
				2			3.75	1	45	0.9	105	1.43	3.6	5.67	4.23	74	3.4	278	5.92
1000167850	6	2	2	1	1		2.25	1	10	0.5	105	1.4	3.47	5.53	4.13	76	15.79	258	6.08
				2			8.75	1	-5	0.9	105	1.47	3.57	5.47	4	112	9.69	328	2.87
1000002420	8.5	1	3	1	0.44		11.25	1	-95	0.5	95	1.4	3.73	5.8	4.4	106	6.86	282	11.5
				2			10	1	-95	0.6	95	1.6	3.93	5.97	4.37	84	11.73	276	10.6
1000171385	14.75	1	3	1	0.84		6.25	1	-30	0.7	105	1.3	3.53	5.4	4.1	138	12.15	260	1.397
				2			3.75	1	-40	0.9	105	1.3	3.37	5.43	4.13	110	5.13	278	1.069
0007065666	9.42	1	3	1	0.96		15	1	55	0.2	105	1.37	3.53	5.63	4.27	86	13.596	260	8.49
				2			11.25	1	-95	0.9	105	1.33	3.6	5.6	4.27	84	9.23	280	5.03
1000173695	15.5	1	3	1	1		7.5	1	-15	0.9	105	1.37	3.77	5.73	4.37	60	6.83	260	5.18
				2			7.5	1	-40	0.9	105	1.4	3.77	5.67	4.27	110	5.76	274	6.8
1000172397	6.5	2	1	1	1		18.75	1	-90	0.6	105	1.47	4.47	5.83	4.37	78	22.35	276	7.38
				2			8.75	1	-90	0.6	105	1.3	3.6	5.63	4.33	94	15.04	284	3.12
1000175767	6	2	2	1	0.88		11.25	1	-95	0.6	105	1.37	3.5	5.5	4.13	78	10.1	296	5.52
				2			25	1	-50	0.8	105	1.53	3.8	5.9	4.37	110	14.63	270	8.59
1000079811	6	1	3	1	0.96		12.5	1	-95	1	105	1.5	3.83	5.97	4.47	72	11.73	284	5.03
				2			12.5	1	-95	0.9	105	1.47	3.7	5.8	4.33	78	16.56	284	5.68
1000173844	6.25	1	1	1	1		6.25	1	-30	0.8	105	1.4	3.97	5.97	4.57	72	8.72	300	3.37
				2			3.75	1	-30	0.9	95	1.43	3.23	5.87	4.43	72	8.13	312	7.4
1000155297	11.17	2	2		0.88
1000109575	9.5	2	3	1	0.88		8.75	1	-30	0.7	105	1.4	3.77	5.73	4.33
				2			12.5	1	-5	0.9	nr	1.27	3.7	5.63	4.37
				Max	1
				Min	0.44
				M SD	0.91±0.11
1000174205	15.33	1	1	1	1		12.5	1	-75	1.5	95	1.1	3.87	5.67	4.57	100	12.091	308	10.02
				2			8.75	1	-50	1.4	95	1.2	3.67	5.63	4.43	98	5.55	342	0.49
1000175219	6	1	1	1	1		17.5					1.33	3.63	5.53	4.2
				2			17.5					1.2	3.7	5.5	4.3
1000178863	6	1	3	1	0.96		21.25	5	np	1.6	nr	1.53	3.87	5.97	4.43	106	1.49	322	6.4
				2			17.5	4	-330	0.8	nr	1.4	3.83	5.73	4.33	98	11.94	362	2.3
0007072608	8.75	1	3	1	0.76		5	1	-65	1	105	1.4	3.73	5.47	4.07	112	0.388	300	1.407
				2			6.25	1	15	1.1	105	1.47	3.67	5.93	4.46	110	10.222	320	4.743
1000003873	8.83	1	1	1	1		6.25	1	-5	0.9	105	1.37	3.93	6.2	4.83	62	14.39	246	5.66
				2			10	1	-30	1.1	105	1.53	3.9	6.27	4.73	62	14.37	284	0.296
1000165010	9	2	3	1	0.8		15	4	np	1.1	nr	1.37	3.83	5.77	4.4	80	8.81	270	8.09
				2			7.25	4	np	1.1	nr	1.33	3.6	5.47	4.13	88	1.13	268	7.48
100097651	9.75	1	3	1	0.84		11.25	1	-50	1.3	105	1.33	3.74	5.57	4.23	76	17.66	274	4.89
				2			11.25	1	-65	1.3	105	1.47	3.9	6.1	4.63	74	7.2	302	2.48
1000157235	10.33	1	1	1	1		7.5	1	-30	0.7	105	1.3	3.5	5.4	4.1	74	15.27	260	3.23
				2			6.25	1	-20	0.8	95	1.4	3.57	5.5	4.1	74	13.18	284	1.64
0007073267	9.17	2	3	1	0.8		10	1	-5	1.4	105	1.47	4.1	5.9	4.43	114	9.26	324	0.27
				2			10	1	-5	1.1	95	1.57	4.23	6.03	4.47	80	12.38	326	2.49
1000183515	10	2	2	1	0.76		13.75	5	-270	1	nr	1.4	3.77	5.97	4.57	100	14.73	292	3.33
				2			16.25	5	-245	1.4	nr	1.67	3.8	5.7	4.03	96	7.8	350	5.088
1000146318	15.17	1	3	1	1		5	1	-50	0.9	nr	1.33	3.63	5.77	4.43	130	0.37	286	2.83
				2			5	1	-30	1.1	nr	1.37	3.6	5.7	4.33	112	11.16	368	7
0000587926	15.25	1	3	1	0.96		17.5	1	-60	1.1	85	1.53	3.93	6.03	4.5	86	4.96	270	5.8
				2			13.75	1	-80	1.2	95	1.43	3.9	5.93	4.5	80	2.78	320	16.71
1000018244	7.67	1	3	1	0.96		8.75	1	-35	1.1	95	1.63	3.97	6	4.37	80	1.47	320	1.725
				2			11.25	5	-250	0.7	nr	1.57	3.8	5.67	4.1	78	11.483	310	6.595
0007027594	12.75	1	3	1	1		5	1	-40	0.8	nr	1.4	3.7	5.87	4.47	106	1.45	332	3.052
				2			3.75	1	-5	1.3	nr	1.47	3.83	5.93	4.47	62	6.97	312	2.63
0007066658	9.25	1	3	1	0.72		8.75	1	105	1	nr	1.37	3.6	5.37	4	78	11.044	286	0.61
				2			8.75	4	np	1	nr	1.33	3.5	5.33	4	80	6.127	294	5.609
1000181470	11	2	1	1	0.92		5	1	-15	1.1	105	1.23	3.43	5.3	4.07	94	12.045	282	4.295
				2			5	1	-15	1.1	105	1.23	3.47	5.33	4.1	118	2.74	380	8.408
1000179104	14.42	2	3	1	1		11.25	1	0	1.2	95	1.33	3.7	5.37	4.03	118	7.763	356	1.17
				2			11.25	1	-50	1.1	95	1.4	3.67	5.33	3.93	112	4.297	286	2.378
1000182062	14.1	1	3	1	1		6.25	1	10	1.6	nr	1.33	3.87	5.87	4.53	72	4.762	348	2.07
				2			8.75	1	105	1.6	105	1.37	3.57	5.5	4.13	84	6.04	326	3.64
0007019117	13.33	2	3	1	0.96		8.75	4	np	1	nr	1.5	3.77	5.63	4.13	72	0.02	362	5.352
				2			6.25	1	-15	1.3	95	1.2	3.47	5.03	3.83	72	5.02	372	2.183
000707596	8.75	1	3	1	0.72		7.5	5	-210	0.8	nr	1.13	3.63	5.87	4.73	94	7.38	254	10.5
				2			12.5	1	-75	1	nr	1.17	3.77	5.73	4.57	84	10.52	366	2.42
1000184934	6.83	1	3	1	0.96		15	1	-5	0.6	105	1.27	3.47	5.3	4.03	100	25.33	274	0.75
				2			13.75	1	20	0.6	nr	1.3	3.43	5.23	3.93	60	32.78	284	0.97
0007015966	14	1	3	1	0.92		12.5	1	-75	1.3	95	1.17	3.6	5.53	4.37	64	1.21	294	2.22
				2			8.75	1	-90	1.4	95	1.33	3.6	5.43	4.1	132	7.79	310	5.8
1000155513	10	1	3	1	1		11.25	1	10	0.7	nr	1.27	3.5	5.4	4.13	88	15.85	322	8.188
				2			12.5	1	-50	1.3	nr	1.4	3.37	5.37	3.97	76	5.01	344	11.55
0000594887	15.42	1	3	1	1		8.75	1	-5	0.6	nr	1.3	3.6	5.57	4.27	98	2.67	364	3.17
				2			3.75	1	55	0.9	nr	1.3	3.6	5.5	4.2	114	1.08	370	2.15
1000168131	8.75	2	1	1	1		5	1	-100	1	95	1.23	3.33	5.23	4	108	10.06	282	1.72
				2			0	1	-30	1.1	95	1.17	3.33	5.27	4.1	76	2.16	346	1.9
1000183249	10.25	1	1	1	0.96		12.5	1	-50	1.2	105	1.23	3.5	5.57	4.33	88	6.45	270	5.74
				2			12.5	1	-50	1.1	95	1.33	3.57	5.67	4.33	90	3.75	262	9.88
100025378	11.42	1	3	1	0.88		15	5	-150	0.8	105	1.3	3.63	5.6	4.3	114	11.34	284	3.75
				2			10	1	-15	1	95	1.23	3.33	5.63	4.4	88	19.96	304	7.91
1000072276	9.17	1	3	1	0.96		13.75	4	np	4	nr	1.33	4.07	5.9	4.57	144	15.18	326	12.9
				2			11.25	4	np	1.8	nr	1.47	3.9	5.93	4.47	132	14.74	338	1.9
0007067947	8.25	1	3	1	0.88		7.5	1	-40	0.9	95	1.23	3.83	5.8	4.57	76	13.76	292	7.65
				2			8.75	1	-40	0.9	105	1.33	3.8	5.63	4.3	76	2.43	288	3.04
0007024563	13.17	2	3	1	1		12.5	1	-5	0.8	105	1.53	3.47	5.37	3.83	114	5.29	290	4.47
				2			5	1	-5	0.6	105	1.53	3.6	5.43	3.9	140	13.52	298	1.76
1000186793	11	1	1	1	0.84		2.5	1	-30	1.1	105	1.27	3.67	5.73	4.47	120	5.84	338	3.629
				2			5	1	-50	1.4	105	1.23	3.57	5.57	4.33	70	8.21	348	2.396
0007056201	10.08	1	1	1	0.96		10	1	-90	0.7	nr	1.33	3.5	5.33	4	74	17.615	316	4.033
				2			5	1	-100	0.7	105	1.33	3.53	5.37	4.03	76	14.43	284	1.8
0007074845	9	1	3	1	0.8		8.75	1	-35	1	nr	1.23	3.53	5.5	4.27	134	7.319	294	4.95
				2			15	1	-95	0.7	95	1.2	3.5	5.43	4.23	140	3.15	302	2.27
1000186352	11	2	3	1	0.96		23.75	1	-5	0.9	105	1.53	3.67	5.37	3.83	116	8.18	302	10.36
				2			21.25	5	-330	0.6	nr	1.57	3.8	5.5	3.93	112	5.5	310	8.276
1000185669	10.33	2	2	1	0.96		5	1	-30	1.2	95	1.23	3.53	5.5	4.27	90	4.9	300	0.8
				2			0	1	-15	1.3	105	1.23	3.53	5.47	4.23	90	10.49	284	6.19
1000156190	12.92	2	3	1	0.92		6.25	1	10	1.1	105	1.37	3.53	5.37	4	80	1.04	318	7.847
				2			11.25	3	-195	0.9	nr	1.4	3.67	5.47	4.07	84	2.4	330	9.18
1000012131	10.5	2	3	1	1		7.5	1	-55	0.6	105	1.37	3.5	5.27	3.9	80	8.13	270	6.64
				2			6.25	1	-5	1	105	1.43	3.57	5.27	3.83	74	13.856	298	2.12
1000184601	13.33	1	1	1	0.92		1.25	1	-65	1.2	nr	1.3	3.6	5.73	4.43	128	4.82	294	5.998
				2			5	1	-75	1.3	105	1.37	3.57	5.8	4.43	84	2.98	318	8.68
1000155169	9.33	1	2	1	0.88		18.75	3	-235	0.9	105	1.47	3.67	4.2	3.67	80	14.59	312	3.098
				2			17.5	3	-350	0.8	nr	1.2	3.7	5.67	4.43	84	4.52	292	0.88
0007024981	12.17	1	1	1	1		5	1	10	1.2	105	1.33	3.53	5.4	4.07	80	9.06	294	1.37
				2			10	1	10	1.1	105	1.23	3.53	5.43	4.2	122	13.77	282	3.16
1000186018	15.33	1	1	1	0.84		6.25	1	-15	1.2	105	1.33	3.6	5.47	4.13	134	0.85	326	18.83
				2			6.25	1	-5	1.3	105	1.37	3.8	5.63	4.27	118	7.56	312	7.682
1000170685	12.08	2	2	1	1		13.75	4	np	1	nr	1.53	3.77	5.73	4.2	92	7.264	330	3.765
				2			15	4	np	0.8	nr	1.57	3.83	5.63	4.07	74	10.11	264	1.665
1000180341	12.83	1	1	1	1		1.25	1	-15	0.7	105	1.27	3.53	5.6	4.33	74	14.66	336	1.41
				2			1.25	1	-15	0.5	105	1.37	3.57	5.67	4.3	80	5.16	326	5.7
1000187161	9.75	2	3	1	0.92		12.5	1	-5	1.4	nr	1.33	3.67	5.57	4.23	84	8.04	322	3.969
				2			8.75	3	0	1.8	nr	1.33	3.43	5.33	4	84	11.8	306	2.251
1000181133	10.17	1	3	1	0.92		10	1	-65	0.3	105	1.37	3.6	5.27	3.9	88	7.702	300	2.715
				2			13.75	5	-195	0.5	105	1.47	3.6	5.5	4.03	118	2.9	326	10.35
1000019469	7.67	2	1	1	0.96		8.75	1	-50	0.3	105	1.17	3.33	5.27	4.1	124	8.69	332	1.79
				2			5	2	-40	0.2	105	1.23	3.43	5.37	4.13	124	17.87	292	2.73
1000187169	7.42	1	1	1	1		10	2	-15	0.2	nr	1.3	3.67	5.83	4.53	74	22.075	286	3.76
				2			10	2	-30	0.2	105	1.43	3.57	5.57	4.13	92	6.762	244	10.9
1000153792	11.25	1	3	1	1		6.25	1	-5	0.5	105	1.23	3.5	5.6	4.37	66	1.26	276	1.86
				2			3.75	1	-30	0.3	105	1.33	3.73	5.63	4.3	52	3.27	264	3.28
1000185387	8.5	2	3	1	0.92		11	1	-45	0.4	105	1.27	3.87	5.9	4.63	116	8.35	288	0.82
				2			10	1	-30	0.5	105	1.13	3.6	5.5	4.37	110	6.49	276	0.66
1000186095	9.25	2	3	1	0.88		3.75	1	-20	0.8	105	1.33	3.5	5.63	4.3	124	5.87	294	4.76
				2			8.75	1	-20	0.7	105	1.33	3.43	5.5	4.17	76	14.4	318	4.55
1000020994	8.67	2	1	1	0.8		5	1	-15	0.3	105	1.27	3.5	5.33	4.07	110	14.8	316	1.95
				2			7.5	1	-65	0.3	105	1.3	3.53	5.37	4.07	94	12.44	298	6.38
1000097658	11.58	1	3	1	0.84		15	2	105	0.1	105	1.4	3.93	5.9	4.5	114	12.01	314	0.02
				2			8.75	1	-90	0.6	105	1.33	3.7	5.8	4.47	104	19.19	322	4.36
1000188060	7.58	1	3	1	0.68		15	5	-220	0.2	nr	1.5	3.9	5.77	4.27	90	13.11	274	5.13
				2			10	2	-30	0.2	105	1.37	3.57	5.5	4.13	112	11.86	270	3.15
1000175093	9.83	2	1	1	1		11.25	1	-30	0.4	105	1.3	3.47	5.27	3.97	146	7.4	336	2.812
				2			8.75	2	-40	0.5	105	1.4	3.33	5.37	3.97	122	6.85	356	9.282
	7.5	1	3	1	0.92		20	5	-245	0.7	nr	1.4	3.37	5.33	3.93	90	11.49	344	16.47
				2			18.75	5	-160	0.5	nr	1.4	3.57	5.37	3.97	76	5.4	312	2.41
1000045464	6.17	1	3	1	0.92		8.75	1	-30	0.5	105	1.3	3.6	5.23	3.93	92	14.148	310	6.786
				2			8.75	1	-5	0.4	105	1.3	3.53	5.47	4.17	120	8.05	284	3.45
1000188265	9.83	2	2	1	0.56		16.25	2	-40	0.1	nr	1.47	3.5	5.4	3.93	96	1.71	312	3.91
				2			10	2	-15	0.2	105	1.17	3.43	5.43	4.27	110	0.26	320	1.92
1000185099	11	1	1	1	0.96		15	2	-50	0.2	105	1.17	3.63	5.77	4.6	120	5.9	332	7.006
				2			12.5	2	-15	0.2	nr	1.23	3.57	5.6	4.37	126	0.9	302	5.687
1000188675	11.75	1	3	1	1		18.75	1	-15	0.8	nr	1.47	3.63	5.53	4.07	114	10.08	300	7.85
				2			15	1	55	0.8	nr	1.47	3.67	5.4	3.93	112	8.71	264	0.74
												1.35±0.11	3.66±0.18	5.59±0.24	4.24±0.21	100.05±23.83	8.77±5.40	302.07±28.17	5.38±3.52
1000181426	6.83	1	2	1	0.68		3.75	1	-5	0.3	95	1.27	3.43	5.23	3.97	86	16.24	292	3.43
				2			6.25	1	-5	0.4	95	1.23	3.5	5.33	4.1	78	13.626	264	8
1000146261	8	1	2	1	0.32		3.75	2	30	0.2	nr	1.37	3.63	5.67	4.3	114	7.82	266	0.97
				2			10	2	-15	0.1	nr	1.2	3.6	5.43	4.23	120	8	354	8.755
0007036384	12.75	2	1	1	0.8		12.5	2	-30	0.1	nr	1.37	3.5	5.13	3.77	142	8.19	322	0.556
				2			7.5	2	-65	0.2	nr	1.23	3.53	5.17	3.93	158	5.739	298	1.65
1000157012	9.5	1	3	1	0.92		11.25	2	-5	0.1	nr	1.33	3.6	5.53	4.2	72	11.733	268	0.69
				2			11.25	2	-30	0.1	nr	1.43	3.7	5.7	4.27	116	8.57	268	0.83
1000188458	11.5	2	1	1	0.92		7.5	1	-15	0.5	105	1.27	3.43	5.37	4.1	64	9.61	296	2.73
				2			3.75	1	-5	0.4	105	1.33	3.43	5.33	4	76	8.09	274	5.61
1000185110	7.83	1	2	1	0.76		5	1	-25	0.5	105	1.17	3.6	5.37	4.2	134	2.87	304	0.11
				2			8.75	1	-15	0.8	nr	1.3	3.83	5.7	4.4	132	6.18	304	6.598
1000184606	8.92	1	3	1	0.72		7.5	1	-90	0.3	nr	1.4	3.73	5.77	4.37	72	15.43	332	2.694
				2			5	1	-15	0.3	105	1.37	3.6	5.57	4.2	128	15.57	310	6.478
0007076542	12.5	1	3	1	0.96		15	1	-45	0.8	95	1.23	3.6	5.47	4.23	134	1.75	294	2.362
				2			12.5	1	-5	0.5	95	1.3	3.57	5.8	4.5	112	0.76	312	1.077
100044967	6.58	1	3	1	0.84		16.25	4	np	np	nr	1.5	3.83	6.07	4.57	106	17.46	326	0.52
				2			11.25	1	-100	0.6	105	1.23	3.67	5.73	4.5	98	14.64	308	3.936
1000185668	9.17	1	2	1	0.56		12.5	1	-5	1.6	nr	1.27	3.6	5.67	4.4	94	21.227	302	6.453
				2			12.5	1	5	0.7	nr	1.2	3.67	5.63	4.43	112	14.254	318	9.654
1000122491	8.08	1	3	1	0.92		16.25	1	10	0.6	105	1.3	3.47	5.4	4.1	134	13.38	360	1.34
				2			16.25	1	-15	0.4	105	1.3	3.8	5.67	4.37	92	5.38	332	1.655
1000190384	12.75	1	3	1	1		16.25	2	-90	0.2	nr	1.37	3.73	5.47	4.1	120	1.65	298	6.037
				2			15	5	-110	0.4	nr	1.23	3.57	5.47	4.23	112	3.35	336	0.533
1000012446	8.08	1	3	1	0.96		17.5	2	-15	0.2	nr	1.27	3.63	5.6	4.33	100	6.375	324	4.75
				2			21.25	1	105	0.3	nr	1.53	3.93	5.73	4.4	120	7.513	348	8.27
1000187909	6.17	2	2	1	0.96		10	1	-5	0.3	105	1.33	3.47	5.37	4.03	86	18.871	376	5.078
				2			12.5	1	-65	0.4	nr	1.33	3.47	5.4	4.07	80	18.428	326	5.447
0000584582	15.67	1	1	1	0.92		5	1	-40	0.3	105	1.33	3.37	5.3	3.97
				2			7.5	1	20	0.3	105	1.3	3.3	5.27	3.97	122	0.95	334	3.345
1000189306	9.85	1	3	1	0.52		12.5	1	-15	0.9	105	1.4	3.63	5.8	4.4	120	4.54	322	1.89
				2			15	1	-15	0.9	nr	1.53	3.7	5.8	4.27	114	3.82	320	4.67
1000096551	9.83	2	3	1	0.76		12.5	5	-185	0.3	nr	1.37	3.73	5.4	4.03	84	6.95	378	0.7
				2			13.75	1	-65	0.6	105	1.43	3.7	5.4	3.97	84	0.82	362	3.2
1000207309	6	2	2	1	0.92		7.5	1	-15	0.5	95	1.27	3.43	5.37	4.1	86	14.29	408	4.32
				2			5	1	-30	0.4	95	1.3	4.34	5.37	4.07
1000208421	6	2	1	1	1		8.75	1	-15	0.3	105	1.17	3.53	5.33	4.17	86	15.07	322	12
				2			7.5	1	-50	0.3	85	1.23	3.47	5.2	3.97	84	5.75	392	0.083
1000072040	6	2	1	1	1		5	2	-15	0.2	105	1.27	3.33	5.07	3.8	132	15.12	364	7.133
				2			10	2	-15	0.2	95	1.37	3.5	5.27	3.9	132	9.69	340	7.893
1000210433	7.25	2	1	1	0.92	7,9	8.75	1	-40	0.8	95	1.33	3.53	5.37	4.03	86	15.03	302	9.13
				2			12.5	1	-40	1	105	1.33	3.67	5.47	4.13	92	15.43	284	11.2
0007046150	13	1	3(双)	1	0.88	2,10,21	15	4	np	np	nr	1.4	3.63	5.63	4.23	72	10.91	334	0.57
				2			15	1	-40	0.4	nr	1.37	3.67	5.67	4.3	132	8.41	312	0.82
1000220434	10.92	1	3(双)	1	0.76	2,5,10,13,21,23	7.5	1	0	0.8	105	1.47	3.73	5.77	4.3	74	9.22	384	4.51
				2			12.5	1	-60	0.9	nr	1.63	2.87	5.03	3.4	140	8.97	398	1.162
1000220903	9	1	2	1	0.92	23	1.25	2	-40	0.2	105	1.27	3.63	5.77	4.5	72	6.68	396	12.62
				2			8.75	2	-5	0.2	95	1.3	3.6	5.8	4.5	66	13.497	356	6.42
1000187835	12.67	1	2	1	0.92	21,23	12.5	1	15	1	nr	1.4	3.73	5.5	4.1	114	6.101	348	3.63
				2			11.25	1	10	0.6	nr	1.47	4.03	5.93	4.47	68	5.037	398	3.54
1000091718	7	2	2	1	0.96	2	21.25	1	-8	0.8	95	1.53	3.77	5.83	4.3	110	1.64	336	5.34
				2			15	1	30	1.2	nr	1.23	3.77	5.8	4.57	104	6.72	396	3.21
1000203319	10	1	3(双)	1	0.96	9	11.25	1	-30	0.9	nr	1.27	3.63	5.27	4	68	13.7	328	9.478
				2			10	1	-40	0.9	95	1.3	3.57	5.5	4.2	60	12.91	366	10.09
1000140702	7.25	2	2 腭心面综合症	1	没填		12	4	np	np	nr	1.23	3.47	5.53	4.3	86	21.56	402	11.6
				2			18	4	np	np	nr	1.57	3.7	5.7	4.13	70	19.04	324	12.04
1000221535	8.83	2	3(双)	1	1		10	2	20	0.2	nr	1.27	3.6	5.33	4.07	66	11.626	276	6.91
				2			8.75	2	-15	0.2	105	1.3	3.53	5.33	4.03	84	9.37	278	2.26
1000125134	7.33	2	2	1	0.8	2,7,9,20,23	10	1	-15	0.3	95	1.23	3.63	5.6	4.37	92	1.79	322	4.5
				2			12.5	1	-40	0.3	95	1.3	3.57	5.6	4.3	76	1.51	312	4.8
1000137770	12.17	2	1	1	1		7.5	1	-30	0.4	105	1.37	3.5	5.53	4.17	64	4.44	400	0.02
				2			12.5	1	-30	0.3	105	1.4	3.53	5.63	4.23	64	6.44	426	2.23
1000001859	9.92	1	3(双)	1	0.96	21	3.75	1	-15	0.5	105	1.4	3.87	5.63	4.23	86	8.04	398	5.26
				2			7.5	1	-5	1.5	105	1.47	3.9	5.8	4.33	118	2.66	374	11.13
10002124	10.83	1	3(双)	1	0.88	5,7,8	3.33	1	-15	0.3	95	1.27	3.77	5.67	4.4	74	17.898	266	3.37
				2			5	1	-30	0.4	105	1.3	3.9	5.9	4.6	72	4.33	354	7.75
1000156605	6	2	2	1	0.92	5,21	5	1	128	0.5	nr	1.13	3.53	5.6	4.47	128	13.31	350	2.63
				2			6.67	2	-30	0.1	105	1.17	3.43	5.47	4.3	98	21.71	314	5.45
1000222831	6.42	2	2	1	0.96	2	5	1	-10	0.7	105	1.37	3.5	5.33	3.97	64	19.06	314	8
				2			-1.25	1	-35	0.6	105	1.33	3.6	5.5	4.17	100	11.87	372	0.58
	15.25	1	2	1	0.68	4,5,8,9,12,17,23,25	20	3	-20	1.8	nr	1.7	3.7	5.4	3.7	74	4.34	308	1.17
				2			11.25	3	10	1.8	nr	1.7	3.73	5.43	3.73	52	11.29	306	0.24
1000222792	7.17	1	2	1	0.76	2,4,7,10,21,23	21.67	4	np	np	nr	1.27	4.07	6.7	5.43	120	1.55	330	4.32
				2			15	1	-30	0.7	105	1.4	3.67	6.07	4.67	82	10.289	268	7.51
1000212376	10.92	1	2	1	0.92	7,8	6.67	2	-30	0.2	nr	1.33	3.67	5.57	4.23	116	16.365	408	5.23
				2			10	2	-5	0.2	nr	1.4	3.83	5.83	4.43	58	7.82	386	1.79
1000202273	13.75	1	3(双)	1	0.96	2	8.33	5	-165	0.8	nr	1.6	4.07	6.03	4.43	64	8.81	298	0.79
				2			8.33	2	-60	1.4	nr	1.43	3.9	5.97	4.53	68	2.5	296	7.47
1000092444	14.5	1	3(双)	1	0.56	7,10,12,13,14,15,18,20,21,23,25	15	1	-15	0.4	nr	1.27	3.5	5.4	4.13	66	5.92	376	5.01
				2			23.33	1	-15	0.4	105	1.4	3.77	5.67	4.27	64	4.88	370	3.2
1000046034	8.08	1	3(双)	1	0.92	7,21	11.67	4	np	np	105	1.23	3.67	5.73	4.5	52	7.17	278	2.14
				2			18.33	4	np	np	nr	1.77	4	6.03	4.27	100	5.17	290	4.31
1000224752	11.5	1	2	1	1		10	2	-15	0.2	nr	1.33	3.67	5.4	4.07	66	14.118	292	12.15
				2			12.5	1	-5	1.1	105	1.33	3.6	5.5	4.17	60	11.04	318	8.67
3000554991	8.75	1	2	1	0.96	5	13.33	5	-280	0.1	nr	1.33	3.77	5.83	4.5	82	15.951	342	7.82
				2			16.25	5	-180	0.1	nr	1.57	3.93	5.9	4.33	82	0.55	392	10.81
1000155175	13.58	1	2	1	0.96	21	10	5	-230	0.4	nr	1.57	3.9	5.6	4.03	58	9.868	342	2.89
				2			11.25	5	-305	0.3	nr	1.57	3.83	5.73	4.07	64	6.24	316	4.16
1000210269	6	1	3(双)	1	0.8	10,14,15,21,23	15	1	-5	0.3	nr	1.4	3.4	5.4	4	112	5.35	306	6.89
				2			16.25	2	-40	0.1	105	1.3	3.53	5.47	4.17	68	9.91	396	12.2
100066686	6	1	3(双)	1	0.84	5,7,10,21	13.3	5	-165	0.5	105	1.37	3.7	5.67	4.3	116	8.534	392	4.24
				2			13.3	5	-220	0.7	nr	1.43	3.9	5.97	4.53	100	16.1	414	8.1
Gender:
Type of cleft:
Ear:
Type of tympanograms:	1= A
	2= As
	3=Ad
	4= B
	5= C
